# Supplementary material for: Comparative Analysis of Functional and Morphological MRI Biomarkers in Assessing Cirrhosis Severity
Source: Research Square preprint supplement (doi:10.21203/rs.3.rs-8821047/v1), 2026-02-16
Supplement: Supplementary file 1 [file 482668dda22434ce014305e4.docx]

|  | **T2-WI** | **T1-WI In-Phase** | **T1-WI Opposed-Phase** | **DWI** | **DCE** | **HBP** |
| --- | --- | --- | --- | --- | --- | --- |
| **Imaging Planes** | Axial | Axial | Axial | Axial | Axial-Coronal | Axial-Coronal |
| **Sequence** | TSE | DIXON | DIXON | EPI | 3D VIBE | 3D VIBE |
| **TR (ms)** | 1000 | 6,96 | 6,96 | 6200 | 4,77 | 4,77 |
| **TE (ms)** | 95 | 2,39 | 4,77 | 68 | 2,21 | 2,21 |
| **FLIP angle (degree)** | 160 | 10 | 10 | 90 | 10 | 10 |
| **Fat Saturation** | - | - | - | - | Fat-Sat | Fat-Sat |
| **Slice Thickness (mm)** | 6 | 6 | 6 | 6 | 6 | 6 |
| **FOV (cm)** | 40 | 40 | 40 | 40 | 40 | 40 |
| **Matrix Size** | 576x576 | 576x576 | 576x576 | 576x576 | 576x576 | 576x576 |
| **Number of Acqusitions** | 1 | 1 | 1 | 1 | 1 | 1 |
| **Parallel Acquisition Technique** | 2 | 4 | 4 | 2 | 4 | 4 |
| ***b* value (s/mm2 )** | - | - | - | 50, 500, 1000 | - | - |
