# Supplementary material for: Comparative Analysis of Functional and Morphological MRI Biomarkers in Assessing Cirrhosis Severity
Source: Research Square preprint supplement (doi:10.21203/rs.3.rs-8821047/v1), 2026-02-16
Supplement: Supplementary file 2 [file b2f7338e2f8cea69056eb183.xlsx]

## Sheet: Anonymised
Anonymised Patient Numbers		DATE	FLIS	ALBI Grade	ALBI Score	MELD-Na Score	Etiology	ASCITES SCORING (1,2,3)	AGE	WBC (10³/µL)	NEUT# (10³/µL)	LYMPH# (10³/µL)	HGB (gr/dL)	HCT (%)	MCV (fL)	PLT (10³/µL)	Glu (mg/dL)	BUN (mg/dL)	Cre (mg/dL)	T. protein (g/dL)	Alb (g/dL)	K (mmol/L)	Na (mmol/L)	Ca (mg/dL)	T.Bil (g/dL)	D. Bil (mg/dL)	ALT (U/L)	AST (U/L)	ALP (U/L)	GGT (U/L)	LDH (U/L)	Serum Triglyceride	INR	PT	APTT	Serum Fibrinogen (mg/dL)	AFP	DECOMPENSATION	Ascites	Hepatic Encephalopathy	Variceal Bleeding	Jaundice ( total bilirubin >3 mg/dl)	Hepatorenal syndrome	Comorbidity- Diabetes mellitus	Comorbidity- Hypertension
1	4.79	2019-03-29	3	3	-1.07	13	2 (MAFLD)	3	66	6900	4300	1700	10.5	32.4	75	89	183	2025-09-28	0.4	5.77	2.41	4	139	7.7	1.76	0.99	51	73	246	210	334	126	1.35	15.26	27.01	93.56	1.82	1	2	1	0	1	0	1	0
2	3.26	2022-04-09	5	2	-2.32	23	3 (cardiogenic/ ivc hypoplasia)	3	27	7200	5300	1000	7.9	24	85	180	113	85.2	8.6	6.4	3.53	5.63	137	9	0.63	0.29	11.7	12.8	251	151	108	208	1.24	14.6	31.4	404.8	3.22	1	2	0	0	0	0	0	0
3	3.22	2022-11-26	1	2	-2.13	16	2 (ALD)	3	60	3700	2100	800	9.1	27.2	98	216	99	33.2	1.5	7.4	3.17	4.71	138	8	0.42	0.29	8.8	13.1	58	24	107	116	1.43	16.9	28.2	211.1	3.81	1	2	1	1	0	1	0	0
4	5.26	2018-07-09	5	2	-2.04	17	1 (HBV)	1	49	2600	2000	300	10.9	31.3	89	43	95	2025-06-20	1.5	6.34	3.53	4.4	140	7.8	1.68	0.64	80	16	18	23	143	135	1.51	16.95	27.82	265.66	3.75	1	2	0	1	0	0	0	1
5	2.97	2022-05-19	4	1	-3.09	15	2 (ALD)	1	52	6500	3700	2100	10.9	33.5	86	124	330	40.5	1.4	7.1	4.05	5.78	135	8.8	0.2	0.12	43.9	22.1	144	47	117	119	1.2	14.2	30.2	292	1	1	1	0	0	0	0	1	0
6	4.46	2015-12-09	6	2	-2.28	10	1 (HBV)	1	59	7900	3500	2800	2025-07-14	43.8	100	130	120	14	2025-01-01	2025-09-07	3.64	2025-03-04	139	2025-08-08	1	0.4	24	27	68	55	202	83	1.22	2025-08-13	2025-02-26	250	3.68	0		0	0	0	0	1	1
7	3.25	2023-10-29	4	2	-1.53	22	1 (HBV)	3	58	10200	7860	1450	8.5	25.3	81	105	185	22.7	0.75	7.1	2.92	4.79	124	10.07	1.61	0.81	21.9	30.1	64	14	117	97	1.25	15.3	29.6	213	1.17	1	2	0	1	0	0	1	0
8	3.29	2020-07-13	6	2	-2.42	11	3 (Kriptojenik)	1	35	2700	1700	700	11.4	34.5	89	61	84	15.3	0.76	6.8	3.7	3.93	144	8.65	0.74	0.39	13.7	26.3	53	37	241	59.8	1.5	19.9	36	148	1.49	1	0	0	1	0	0	0	0
9	3.38	2023-04-13	5	2	-2.39	14	1 (HBV)	1	63	5440	3490	1230	12.2	36.3	86.6	82	109.9	15.5	0.84	7.68	3.77	4.71	133	8.87	1.02	0.45	17.1	35.4	108	43	171	113.4	1.2	14.4	26.8	208	3.97	1	2	0	1	0	0	1	1
10	2.94	2023-12-10	6	1	-3.32	8	1 (HBV)	1	58	4300	1990	1930	13.2	37.6	85.5	168	77	12.7	0.82	6.9	4.68	4.1	141	9.03	0.59	0.23	19.9	19.8	66	15	171	100.1	1.11	13.2	26.2	240	4.5	0		0	0	0	0	0	0
11	4.47	2017-03-15	4	2	-1.97	15	3(klatskin tm)	1	48	8100	6600	900	2025-02-10	32.2	72	216	107	2025-02-12	0.9	7.29	3.43	2025-04-04	135	9	1.58	0.73	15	41	343	165	223		1.36	2025-01-16	2025-09-30	384	2.96	1		0	0	1	0	0	0
12	2.99	2023-11-22	6	2	-1.39	10	3 (kriptojenik)	1	77	3810	2210	850	8.4	26.7	76.5	81	134.9	16.2	0.61	4.67	2.43	4.51	132	8.08	0.62	0.41	8.4	15.7	75	8	119	76.3	1.34	16.4	31.7	290	1.64	1	2	1	1	1	0	1	0
13	3.12	2015-09-02	3	2	-1.86	14	1 (HBV)	1	18	5070	3700	700	14.3	43.6	92	52.3	73.7	8.1	0.49	6.42	3.41	4.42	142	8.52	2.18	1.05	21.6	40.2	121	44	185	51	1.45	16.94	38.75	196	1.57	1	0	0	1	0	0	0	0
14	3.71	2021-10-05	4	2	-1.86	14	3 (alfa-1 antitripsin eksikliği)	3	45	1900	1300	400	7.3	23.2	95	56	183	26	1.17	4.95	3.07	4.69	142	8.93	0.81	0.46	13	27	59	4	209	20.8	1.72	19.1	28.9	111	1.61	1	2	0	0	0	0	0	1
15	4.24	2015-12-13	6	1	-3.14	11	2(NAFLD)	1	65	2900	2100	400	12.2	36.5	93	89	184	18.2	2025-01-01	7.1	4.22	4.8	137	9.2	1	0.28	22	25	48	44	211		1.09	12.2	21.7		1.83	1	?	0	1	0	0	1	0
16	3.73	2023-12-22	6	1	-3.42	10	3 (PBK)	1	51	5940	3840	1510	14.7	43.8	90	122	85		0.7		4.64	4.54	136	9.64	1.13	0.37	9.2	18.1	47	16	11	99.7	1.04	12.4	28.4	322	1.34	0		0	0	0	0	1	0
17	3.53	2023-05-02	6	1	-3.19	7	1 (HBV)	1	45	5720	3200	1600	13.5	43.3	80	123	70	9.7	0.9	6.6	4.33	4.02	142	9.15	0.32	0.17	16.3	16	62	20	150	54.4	1.01	12.2	25.9	239	2.96	0	0	0	0	0	0	0	0
18	3.53	2019-11-11	5	2	-2.37	14	2 (MAFLD)	1	48	2700	1500	800	13.8	40.9	89	38	123	11.5	0.64		4.05	3.91	141	8.83	2.47	0.94	30.8	47.2	113	31	253	76.4	1.44	18.3	34.17		5.39	1	0	1	0	0	0	1	0
19	2.62	2021-12-15	4	2	-1.67	9	2 (MAFLD)	1	58	2900	2100	500	7.3	22.1	66	68	140	9.49	0.8	6.28	3.65	3.38	140	8.8	1.28	0.57	13	24	81	65	139	240.1	1.14	13.6	25.5	211	2.3	0	0	0	0	0	0	1	0
20	3.05	2022-09-07	5	1	-3.15	8	3 (kriptojenik)	1	48	5200	3800	900	12	38.3	84	71	84	8.7	0.63	7.7	4.52	5.26	142	9.45	0.66	0.25	39.9	41.3	135	70	172	67.9	1.15	13.7	26.3	175	5.12	0	1	0	0	0	0	0	0
21	5.01	2018-12-06	3	3	-1.17	21	1 (HBV+HCV)	1	48	2100	1500	200	7,2	21,1	102,2	18,7	234	17,66	1,1	5,85	3,06	3,7	141	8,1	7,86	2,2	16,6	28	73	24	307	14,9	1,62	18,3	46,77	150	3,19	1	2	1	1	0	0	0	0
22	4.11	2018-02-16	6	1	-3.32	6	1 (HBV)	1	63	5500	3100	1900	13.4	39.7	85.6	189	78	14.02	0.9	8.3	4.62	4.1	142	9.8	0.48	0.21	16	31	124	64	189		0.99	11.84	25.76		247.8	0		0	0	0	0	0	1
23	3.6	2019-12-04	4	2	-1.88	8	1 (HBV)	3	75	8170	3200	4610	9.21	27.77	94.13	114.3	98	14.67	0.92	2.3	3.15	3.9	144	7.94	0.94	0.48	12.6	38.4	98	82	237	44	1.19	15.3	28.9	309	6.1	1	2	0	0	1	0	0	1
24	3.92	2023-01-04	4	2	-1.99	12	1 (HBV)	1	64	5110	2790	1160	13.6	38.2	93.4	117	191	12.2	0.69	6.4	3.61	4.22	139	8.74	2.48	0.93	37	35.6	85	48	227	80	1.19	14.1	30.8	336.59	3.11	1	0	1	0	1	0	1	0
25	2.82	2021-04-09	6	1	-3.29	11	1(HBV)	1	60	4100	2400	900	12.6	39	83	51	160	13.6	1.09	7.5	4.76	4.16	138	9.62	0.83	0.3	19.5	23.5	131	17	196	74.1	1.2	13.4	25.1		4.14	0		0	0	0	0	1	0
26	3.69	2022-04-07	4	2	-1.55	17	3 (PBK)	1	63	2600	1800	500	10,5	31,3	90,8	44	116,9	28,6	0,73	5,98	2,96	3,38	133	8,37	1,72	0,68	11,1	15	83	9	181	82	1,41	16,4	31,6	111,2	0,67	1	2	1	1	1	0	0	0
27	3.21	2021-11-23	3	3	-1.17	21	1 (HCV)	3	49	6700	5000	800	11,3	34,1	101,5	155	77,1	26,78	1,19	7,41	2,59	3,83	130	8,92	2,15	1,37	28,4	53,1	138	18	312	54,3	1,42	16,2	31,6	232	4,54	0	1	0	0	1	0	1	0
28	6.09	2019-07-16	5	2	-2.05	11	3 (kriptojenik)	1	53	2900	1800	700	12,1	35,5	92,7	42	124	9,91	0,6	6,2	3,41	4,3	139	8,64	1,13	0,6	13,4	48,9	158	64	160	74	1,4	15,59	32,8	244	2,63	1	0	0	1	0	0	1	1
29	3.9	2022-09-23	6	2	-2.31	7	1 (HBV)	1	65	5400	2000	2000	6,9	21,5	87	356	142,2	24,9	1,03	6,61	3,43	4,67	133	9,42	0,48	0,39	11,2	23,9	174	17	188	46	1,07	12,8	28,8	284,5	1,75	1		1	0	0	1	1	1
30	3.62	2019-10-09	5	2	-1.71	18	2 (ALD)	1	58	7900	3700	2800	13,6	41,1	95	104	199	10,1	0,74	8,1	3,3	4,44	132	9,12	2,7	1,22	34,2	46,8	97	128	271	101	1,42	15,76	33,74	241	12,09	1	0	1	0	1	0	1	1
31	4.34	2022-03-21	4	2	-1.78	18	2 (MAFLD)	2	62	3300	2400	300	8,5	24,8	110	56	101,6	21,03	0,7	5,49	3,37	4,38	132	8,68	2,61	0,98	17	31	92	22	283	62,7	1,41	16,5	31,3	131,7	2,64	1	2	1	0	0	0	0	0
32	5.21	2021-12-22	5	1	-2.99	9	2 (ALD)	1	63	6900	4100	1900	14,8	43,9	84	133	91	12,9	0,97	7,2	4,45	4,09	139	9,22	0,94	0,36	11,8	21,8	76	51	220	74,6	1,27	14,1	29,9	261	1,47	1		0	1	0	0	1	0
33	2.86	2020-03-01	6	1	-3.18	7	1 (HBV)	1	45	7200	4400	2300	15.6	46.6	88.6	156	200	12.9	0.93	7.3	4.69	4.01	141	9.48	0.96	0.37	44	29	71	71	185	-	1.02	13.6	28.7	-	4.37	0		0	0	0	0	1	0
34	3.01	2020-01-12	6	1	-3.36	7	1 (HCV)	1	79	4390	2820	1180	11,46	34,7	80	110,3	73	32,8	1,05	7,8	4,71	4,36	140	10,94	0,55	0,29	17	23,9	55	22	170	103,6	1,05	13,6	30,1	306,61	0,61	0	0	0	0	0	0	1	1
35	5.66	2020-09-14	2	2	-1.43	27	3 (kriptojenik)	3	45	3300	2600	200	12.1	34.8	90.2	55	570	39.81	1.5	6.43	2.96	8.6	124	8.6	2.6	1.94	17	27	181	121	155	119	1,39	18	28,1	599	3.32	1	2	1	1	1	1	1	0
36	4.2	2023-05-06	6	1	-2.82	12	1 (HBV)	1	74	4890	2540	1620	15.7	48.7	94.5	93	86	30.5	1.54	8	4.01	4.67	145	9.42	0.46	0.21	13	20.1	93	25	218	118.7	1.1	13.4	31.6	657.9	3.66	0		0	0	0	0	0	1
37	7.79	2018-11-02	4	1	-2.64	9	2 (MAFLD)	1	71	4000	2500	800	12	36.5	81.9	116.8	174	17.76	0.9	7.5	4.09	3.5	141	9.4	1.07	0.47	31	50	105	62	265	170	1.2	13.91	26.26	255.84	11.28	0	1	0	0	0	0	1	1
38	2.99	2019-10-01	5	1	-3.08	8	2 (MAFLD)	1	65	7660	4340	2380	13.82	40.01	91.5	175.8	98	13.4	0.66	6.9	4.51	4.5	146	9.97	0.8	0.28	48	51.4	108	23	137	79	1.11	14.6	24.8	YOK	6.86	0		0	0	0	0	1	1
39	2.79	2020-03-12	6	1	-2.79	8	1 (HBV)	1	73	7450	5150	1520	13.28	38.63	92.35	107.4	117	26	0.93	8.1	4.08	4.37	138	9.39	0.63	0.32	17	29.3	198	61	287	YOK	1.2	15.4	32	YOK	2.22	0	0	0	0	0	0	0	0
40	4.41	2019-02-27	6	3	-1.29	19	2 (MAFLD)	1	72	5000	3100	1200	13.1	39	99.5	85	120	13.55	0.9	6.7	3	4.6	137	9.6	4.71	2.59	51	75	227	72	322	81	1.57	17.49	35.72	119.89	14.11	1		0	0	1	0	1	1
41	4.47	2019-08-23	2	3	-0.52	22	2 (MAFLD)	2	73	6370	4370	690	8.29	25.01	106.4	75.5	110.5	48.88	0.94	5.69	2.24	5.53	137	9.73	7.37	5.98	50.3	77.1	193	110	349	69.1	2.07	26.2	44.7	152	2.89	1	2	1	0	1	0	0	0
42	3.56	2017-06-05	6	1	-2.92	9	1 (HBV)	1	39	5200	2100	2400	15.6	45.8	93.6	86	84	8.2	0.91	8.2	4.5	4.6	142	9.52	1.37	0.54	22.1	28.3	52	51	134	59	1.13	15.4	32.1	124.9	3.98	1	2	1	1	1	0	0	0
43	4.28	2022-03-05	5	3	-1.25	9	3 (kriptojenik)	1	84	5600	3300	1300	14.2	41.9	95.4	154	88	19.95	0.59	4.62	2.49	4.62	141	11.2	1.22	0.45	77	81	149	69	300	80.6	1.21	14.3	27	173.8	2.95	1	0	1	0	0	0	0	0
44	3.82	2021-06-26	5	3	-0.98	6	2 (ALD)	2	58	3700	1700	1400	10.9	30.9	91.6	125	155	17.94	0.58	4.57	1.72	3.63	140	7.91	0.31	0.15	13.6	20.2	116	92	212	160	0.94	10.7	26.5	500.2	1.7	1	2	0	0	0	0	1	0
45	3.5	2023-10-13	5	1	-2.65	11	3 (kriptojenik)	1	34	2440	1500	590	13.4	40.1	84.8	19	91	11.5	0.81	7.3	4.22	4.02	141	8.8	1.54	0.68	19	36.7	88	42	177	77.2	1.35	16.4	30.1	94.13	1.44	1	0	0	1	0	0	0	0
46	3.22	2022-02-02	5	2	-2.1	13	3 (kriptojenik)	1	62	5100	2700	1600	13.2	39.9	87.5	98	200	6.4	0.59	6.5	3.81	4.21	140	8.69	3.08	1.03	16.9	28.8	118	19	272	79.2	1.24	14.6	29.2	173.8	2.58	1	0	1	0	1	0	1	1
47	5.06	2022-08-07	2	3	0.59	14	1 (HBV)	3	40	2000	1300	500	7.8	23.5	111.1	51	126.5	14.9	0.96	1.5	0.5	3.83	136	8.05	2.05	1.07	4.7	13	38	19	204	299.2	1.36	16	26	304.1	3.03	1	2	0	0	0	0	0	0
48	3.77	2020-12-31	4	3	-0.86	22	2, 3 (MAFLD+BuddChiari)	3	74	6800	4800	800	10	31.1	73.6	176	89.5	27.01	0.96	4.61	1.79	4.06	126	8.02	0.58	0.21	12.9	25.6	79	42	199	96.6	1.62	21.4	31.5	580	16.44	1	2	1	0	0	1	0	0
49	2.62	2022-06-29	6	1	-3.14	6	3 (otoimmun hepatit)	1	61	3100	1900	800	13.1	39.4	85.4	85	121.6	16.6	0.72	7.41	4.53	4.55	141	9.5	0.7	0.2	15.4	18.3	74	19	247	71.4	1	12	24.8	306.9	4.59	0	0	0	0	0	0	1	0
50	4.6	2018-03-22	5	2	-1.93	9	2 (MAFLD)	1	61	7000	5000	900	11.3	35.4	75.1	30	277	14.02	0.7	-	3.19	4.2	134	9.4	0.89	0.39	16	23	99	44	261	87.3	1.3	15.34	27.85	-	2.43	1	2	1	0	0	0	1	0
51	3.86	2016-01-16	6	2	-2.53	7	1 (HBV+HDV)	1	62	3100	2200	400	13.5	40	91.3	72	92	11.21	0.6	7.8	3.88	4.4	142	8.8	0.85	0.33	26	40	65	4	40	149.7	1.1	12.57	29.34	-	1.64	0		0	0	0	0	0	0
52	5.25	2019-09-28	6	1	-3.41	7	1 (HBV)	1	77	6900	4200	2000	13.3	40.1	86.4	148	106	19.3	0.73	8.3	4.72	4.05	144	9.99	0.47	0.19	19.8	30.4	117	33	200	YOK	1.1	14.4	24.3	398.98	5.76	0	0	0	0	0	0	0	1
53	3.95	2022-09-23	5	1	-2.98	9	1 (HCV)	1	72	7100	3700	2500	12	37.1	82.3	164	79	10.9	0.73	7.8	4.53	4.36	141	9.05	1.2	0.45	16	19.9	87	28	152	136.6	1.15	13.7	26.4	207.6	3.63	1	2	0	0	0	0	0	1
54	4.73	2019-10-06	6	1	-2.66	13	2 (MAFLD)	1	66	4800	3200	1000	10.4	31.7	82.9	115	270	22.2	1.31	7.5	4.21	4.36	136	9.29	1.42	0.57	27.9	44.5	106	102	231	84.8	1.14	13.19	23.85	271	3.83	1	0	1	0	0	0	1	1
55	5.19	2018-12-10	4	2	-2.09	11	2 (MAFLD)	1	65	7400	5600	1100	10.5	33	69.7	171.8	100	14.62	1.2	7.59	3.49	3.8	136	8.7	1.26	0.85	18.8	36	89	70	230	88	1.23	14.36	26.62	248.73	2.33	1	2	0	0	0	0	1	1
56	4.88	2023-04-02	6	2	-2.31	8	3 (kriptojenik)	1	69	6210	3530	1650	14.5	44	98.2	79	86	17.4	0.82	7.3	3.67	4.5	140	8.68	1	0.4	16	21	52	16	250	79.9	1.13	13.6	25.2	-	2.21	1	0	0	1	0	0	0	0
57	3.51	2020-02-02	6	3	-1.35	16	2 (ALD)	1	72	2030	1090	690	11İ42	32.03	103.6	39.3	87	16.1	0.67	6.1	2.87	4.21	138	8.18	2.61	1.61	33.9	57.5	157	133	190	52.2	1.69	21.3	41.4	179	6.92	1	0	0	1	1	0	0	0
58	6.36	2014-02-19	6	1	-3.55	7	1 (HBV)	1	55	7000	4400	1800	16.7	51.4	82.3	151	209	-	0.9	7.4	5.09	3.3	140	9.8	0.87	0.38	33	26	89	20	162	105	1.03	12.15	26.83	-	1.78	0		0	0	0	0	1	1
59	5.47	2018-05-01	6	1	-3.4	7	1 (HBV)	1	49	5200	2700	2000	15	43.6	90.5	97	78	16.82	0.8	6.8	4.67	4.2	140	9.3	0.42	0.2	32	26	62	19	221	75.3	1.09	13.12	28.71	160	1.43	0		0	0	0	0	0	0
60	2.47	2021-01-05	5	1	-2.64	7	2 (MAFLD)	1	63	3600	2000	900	8.2	25.4	85.8	87	158	17.01	0.8	7.08	3.96	4.6	137	9.6	0.74	0.26	13	22	79	24	214	107.5	1.01	13.6	26.4	435	1.35	1	2	0	1	0	0	1	1
61	7.33	2020-12-16	2	2	-2.25	11	2 (MAFLD)	3	58	3700	2400	700	8.8	24.9	97.9	52	164	16.45	1	5.91	3.69	3.65	130	8.4	1.29	0.63	12	28	76	36	131	36	1.34	17.9	31	226	1.49	1	2	1	1	0	1	1	1
62	3.89	2022-04-12	2	2	-1.98	15	2 (MAFLD)	3	72	5700	2800	1800	12.4	36.7	103	58	140	17.3	1	7	3.6	5.1	137	9.2	2.5	1.2	73	101	194	34	313	77	1.35	15.1	28.8	141	29.65	1		0	0	1	0	1	1
63	3.76	2021-03-29	5	2	-2.34	11	2 (MAFLD)	1	63	4700	2500	1300	11.9	36.2	97	120	111	15.4	0.7	7.5	3.6	4.5	143	9.3	0.72	0.36	25	46	136	62	233	104	1.52	16.7	26.7	264	3.29	1	1	1	0	0	1	1	0
64	3.77	2022-12-24	4	2	-2.07	13	2 (MAFLD)	2	72	9000	6300	1400	12.1	37.1	92	308	93	13.6	0.8	7.1	3.1	3.6	134	9	0.42	0.26	13	36	122	39	181	117	1.22	14.5	24.7	290	1.72	1	1	1	0	0	0	1	1
65	3.42	2018-07-18	6	2	-2.43	9	1 (HBV)	1	72	3300	1300	1400	10.1	30.9	80	111	135	22.8	0.9	6.3	3.5	3.6	145	9.6	0.39	0.16	20	43	72	34	188	170	1.23	14.5	27.3	371	2.42	1		1	0	0	0	1	1
66	3.69	2015-03-13	6	2	-2.54	10	1 (HBV)	1	63	1900	1200	400	11.8	34.7	94	55	85	12.6	0.5	6.5	4.1	4	142	8.7	1.58	0.55	17	28	85	18	240	47	1.16	13.5	27.8	217	2.64	1		1	1	1	1	0	0
67	9.77	2020-10-11	6	1	-3.16	6	1 (HBV)	1	32	6990	4660	1900	12.6	37.9	89	179	78	10.2	0.6	7.3	4.4	4.2	142	9.2	0.44	0.18	45	36	53	16	142	57	0.97	11.7	25.6	216	1.78	0		0	0	0	0	0	0
68	4.93	2021-06-20	6	2	-2.08	11	1 (HBV)	1	32	3000	1700	900	9.1	29.1	76	60	81	7.6	0.5	6.4	3.4	3.8	139	8.4	1	0.56	44	63	103	49	170	148	1.43	16.1	29.6	93	19.85	1		0	1	0	0	0	0
69	4.7	2018-07-16	6	2	-2.2	16	2 (MAFLD)	1	73	3300	2300	700	10.8	30.7	71	75	120	8.9	0.4	7.3	3.9	4.5	143	9	2.88	1.29	15	29	64	53	232	147	1.61	17.9	28.3	344	5.1	1		1	0	1	1	1	1
70	4.41	2023-02-16	5	2	-2.31	8	1 (HBV)	1	66	3300	1700	1000	11.9	36.4	88	61	87	9.3	0.7	6.7	3.6	3.7	137	8.4	0.8	0.32	38	42	84	21	218	204	1.18	13.2	27.1	206	1.35	0	1	0	0	0	0	1	0
71	4.46	2019-12-08	5	1	-2.66	13	2 (MAFLD)	1	58	6500	4200	1200	14	41.7	98	62	90	13.7	0.9	7.3	4.2	4.4	136	8.9	1.42	0.69	30	38	107	54	189	93	1.5	19.8	36.9	275	883.2	1	1	1	1	1	0	0	1
72	3.92	2022-03-26	2	3	-1.12	20	2 (ALD)	3	58	15500	11000	2900	8.6	25.7	102	281	114	23.1	1.1	6	2.7	4.5	131	8.5	3.56	3.26	23	39	155	73	158	95	1.28	15	26.2	280	70.4	1	1	1	1	1	1	0	1
73	4.84	2017-07-24	5	2	-1.74	27	3(kriptojenik)	2	80	4600	4000	200	7.5	22.8	100	63	140	116.2	6	8.1	3.2	4.9	134	7.9	1.76	0.8	8	19	125	46	138	62	1.45	16.1	27	289	2.54	1	1	1	1	0	1	1	1
74	3.83	2022-07-20	6	2	-1.8	9	1 (HBV)	1	55	2800	2300	300	11.5	34.6	85	84	99	13.9	0.6	6.6	3.6	4	142	8.2	0.79	0.14	8	29	50	24	207	64	1.23	14.6	27	121	3.4	0	1	0	0	0	0	0	0
75	3.64	2023-11-13	5	2	-2.22	9	1 (HBV)	1	65	3280	2070	760	13.6	41.1	98	85	78	15.7	0.9	6.4	3.7	4.1	142	9.1	1.5	0.57	21	28	65	40	177	103	1.07	13	28.7	183	2.41	0		0	0	0	0	0	0
76	6.9	2018-10-30	6	1	-3.4	7	1 (HBV)	1	45	3500	2000	1000	10.9	32.6	79	128	94	9.4	0.8	7.1	4.6	4.8	141	9	0.35	0.19	19	29	86	12	201	91	1.05	12.4	28.4	257	3.48	0		0	0	0	0	0	0
77	3.49	2019-08-31	6	1	-3.15	7	1(HBV)	1	65	5700	3000	2000	11.5	35.6	91	160	102	17.2	1	7	4.4	4.7	144	9.2	0.46	0.19	11	17	69	13	175	60	1.01	11.9	25.2	314	1.45	0		0	0	0	0	1	1
78	3.47	2018-07-16	5	2	-2.46	13	3( kriptojenik)	1	63	2600	1500	700	8.4	26.8	69	41	80	14.5	0.9	7	4	4.5	144	9.4	1.58	0.77	25	38	69	38	188		1.58	19.1	39.1	-	1.85	0		0	0	0	0	0	0
79	8.56	2016-05-18	5	3	-0.9	23	3 (kriptojenik)	1	59	6600	3600	1800	11.3	33.7	115	113	87	16.4	1.1	6.5	2.6	5.3	134	8.7	5.6	3.3	24	60	120	20	362	47	1.71	19.3	38.5	-	0.81	1		0	0	1	0	0	0
80	4.42	2023-04-01	4	2	-1.93	15	2 (MAFLD)	1	68	4800	2900	1100	10.9	32.6	94	77	134	8.7	0.8	6.3	3.6	4.5	139	8.3	3.04	1.11	22	37	82	50	211	92	1.43	16.9	30.5	144	2.32	1	1	1	1	1	0	1	1
81	4.47	2018-10-09	6	2	-2.23	16	3(otoimmun)	1	50	4700	2900	1400	11.1	32.9	102	44	79	13.1	0.6	6	3.9	4.2	143	8.6	2.56	1.09	14	22	84	5	211	42	1.66	18.4	32.6	119	1.16	1		0	0	1	0	0	0
82	2.78	2022-05-09	6	1	-3.07	9	3(PBK)	1	55	2800	2000	400	11.9	36.5	72	74	89	17.3	1	8.2	4.6	4.5	143	9.7	1.08	0.57	32	33	218	45	171	92	1.18	14	27.6	215	2.58	0		0	0	0	0	0	0
83	5.9	2019-03-26	4	1	-3.03	6	1 (HBV)	1	61	5800	3200	2100	13.1	39.5	87	312	113	15.4	0.8	7.4	4.3	5.3	140	10.2	0.52	0.23	18	18	66	42	133		0.98	11.9	21.3	-	1.22	0		0	0	0	0	0	0
84	5.05	2015-03-19	6	1	-2.83	8	1 (HBV)	1	61	8200	5400	2100	14.7	44.1	81.5	192	94	-	0.8	-	4.45	4.72	140	-	1.62	0.55	43	41	182	167	-	-	1	11.62	23.65	-	4.59	0		0	0	0	0	0	0
85	5.77	2015-08-19	6	2	-2.35	12	2 (MAFLD)	1	50	4600	2600	1300	14.6	41.9	106.4	105	-	10.28	0.63	-	4.01	3.82	140	9.79	2.33	0.75	40	40	63	21	303	366	1.24	14.65	-	-	2.56	1		1	0	0	0	1	0
86	4.07	2020-02-14	4	2	-1.52	11	3(kriptojenik)	1	70	3380	1770	960	9.6	28.5	97	82	94	17.8	0.8	6.5	2.9	3.9	141	8.3	1.61	0.8	21	54	150	61	233	92	1.3	16.7	31.6	268	3.92	0		0	0	0	0	1	1
87	4.67	2018-09-01	6	1	-3.06	13	1 (HBV)	1	38	3100	1900	800	15.3	46	78	29	89	13.1	0.8	7.3	4.8	4.3	144	9.5	2.02	0.73	17	21	58	17	156	87	1.47	16.5	31.5	-	2.45	0		0	0	0	0	0	0
88	4.95	2021-03-18	4	2	-2.15	11	3(kriptojenik)	1	70	5400	2800	1800	12.5	37.4	93	126	85	14.1	0.6	6.8	3.6	4.2	142	8.6	1.42	0.49	19	33	174	167	238	58	1.34	14.9	27.7	322	3.26	0		0	0	0	0	0	0
89	3.6	2022-09-13	6	1	-2.92	8	1(HBV)	1	39	7000	3300	3000	14.6	42.5	92	127	103	12.5	1	8.2	4.9	4.5	144	9.5	1.39	0.34	24	20	78	28	160	520	1.05	12.6	26.1	251	2.14	0		0	0	0	0	0	0
90	2.83	2019-01-23	6	2	-1.71	10	1(HBV)	1	67	3600	2400	800	10.5	31	75	114	119	19.2	0.7	7.1	3.6	4.2	143	8.5	1.1	0.48	16	22	79	15	161	44	1.32	15.2	29.5	327	1.3	0		0	0	0	0	0	0
91	4.58	2018-04-27	4	2	-2.58	9	3 (PBK)	1	42	10500	3200	4400	15.5	48.5	100	241	82	21	1.2	7	3.9	5.1	139	9.8	0.77	0.38	44	52	237	109	333	51	0.95	11.5	26.6	386	1.1	0		0	0	0	0	0	1
92	6.43	2018-11-13	4	2	-1.88	11	3 (PSK)	1	37	7900	4600	2200	13.4	38.3	95	125	106	7.5	0.7	7.3	3.4	3.9	140	9.9	1.95	1.43	36	81	162	43	235	128	1.18	13.7	30.6	276	4.14	0	1	0	0	0	0	0	0
93	5.02	2024-01-11	4	2	-2.22	13	3(kriptojenik)	1	60	3790	2940	620	12.3	37.1	87	354	157	10.3	0.6	6.6	4	4.6	140	9.3	3.63	2.45	31	86	142	144	244	47	1.13	13.5	34.4	330	2.92	1		0	1	1	0	0	0
94	4.84	2022-04-28	2	2	-1.65	22	2(MAFLD)	3	66	4300	3600	400	8.7	27.8	83	115	119	43.9	1.4	7.1	3	3.2	141	8.3	1.35	0.79	14	26	176	69	178		2.68	30.1	33.3	253	70.4	1		1	1	1	1	1	1
95	3.01	2021-02-24	3	2	-2.28	12	1 (HBV)	1	70	4400	2700	1200	15.3	45.3	89	145	98	13.7	0.7	6.5	3.9	4.7	142	9.6	2.17	0.8	32	41	86	50	300	47	1.31	17.1	29.5	245	13.53	1	1	1	0	0	1	0	0
96	3.56	2016-02-29	6	3	-1.28	13	3 (kriptojenik)	3	81	3800	3000	500	6.3	10.4	104	445	85	25.7	0.9	6.6	2.74	4.5	138	7.7	2.24	1.06	7	47	180	33	821	49	1.4	15.8	31.5	312	3.77	1		1	1	1	0	0	0
97	4.51	2015-07-09	4	2	-2.16	8	1 (HBV)	1	59	10700	3500	5900	11.8	35.6	118.5	64	-	-	0.68	5.38	3.6	4.1	140	8.94	1.33	0.95	120	135	150	181	222	65	1.01	12.06	24.5	-	2.47	1		0	0	1	0	0	0
98	3.9	2021-10-01	6	1	-3.36	7	1 (HBV)	1	57	5900	2900	2300	14.6	45.3	96	302	106	14.2	0.8	8.2	4.9	4.8	140	9.9	0.98	0.34	34	31	75	30	181	103	1.08	12.2	25.9	264	4.22	0		0	0	0	0	0	0
99	6.01	2020-09-06	6	1	-2.92	11	2 (MAFLD)	1	65	3900	2800	500	9	28.6	70	76	175	25	0.6	6.5	3.3	4.2	139		0.56		31	42	74	26	363	69	1.39	18	-	-	2.2	0	1	0	0	0	0	1	0
100	6.67	2020-12-26	6	1	-2.72	9	2 (MAFLD)	1	56	2600	1700	500	13.4	38.8	82	68	154	9.3	0.7	7.6	4.2	4.3	139	9.5	1.14	0.46	23	24	170	48	143	93	1.16	15.6	34.4	376	5.32	0		0	0	0	0	1	0
101	2.98	2023-08-01	6	1	-3.24	9	3 (Budd Chiari)	1	36	5700	3600	1500	14.1	42.5	92	171	108	11.8	0.9	8.2	5	5.2	142	10	1.98	0.6	20	31	52	31	211	85	1.04	12.5	25.4	186	2	0		0	0	0	0	0	0
102	1.39	2022-06-06	6	1	-3.3	7	1 (HBV)	1	60	5800	3100	1900	14.1	43	90	186	90	17	1.1	7.2	4.7	4.4	142	9	0.65	0.24	13	17	66	26	184	73	1.01	12.1	25.2	345	2.11	0		0	0	0	0	0	0
103	3.33	2023-12-19	6	1	-3.18	7	1 (HBV)	1	67	6240	4420	1360	16.3	46.5	84	126	95	16.8	0.9	7	4.5	5	143	9.2	0.55	0.29	14	21	77	34	190	67	1.07	13.3	25.5	386	2	0		0	0	0	0	0	0
104	3.75	2022-10-30	5	2	-2.47	10	3 (kriptojenik)	2	66	4500	2800	1100	13.5	39.6	98	117	89	10.2	0.8	7.1	4.1	4.4	141	9.3	2.04	0.77	38	44	104	56	189	82	1.07	12.8	26.3	234	2.13	1	1	1	0	1	0	0	1
105	3.27	2019-07-05	5	2	-1.59	14	1 (HBV)	3	58	5100	2040	2030	11.9	35.5	101	95	91	34.5	1.1	7.6	2.6	4.8	135	8.4	0.51	0.18	15	35	101	22	210		1.3	16.9	30.1	288	6.33	1	1	0	0	0	0	0	1
106	6.29	2018-05-07	6	1	-2.74	12	1 (HBV)	1	43	3500	2400	700	13.5	38.5	85	56	98	12.6	0.6	6.9	4.4	4	141	9.7	1.92	0.99	20	30	84	25	196	61	1.35	16.1	26.5		2.27	0		0	0	0	0	0	0
107	4.93	2015-05-10	4	2	-1.81	16	2 (MAFLD)	1	61	5500	3300	1400	9.6	29	95	62	206	10.3	0.6	8.1	3.2	4.2	133	8.7	1.4	0.74	48	76	117	49	185	81	1.28	15	31		2.06	1	1	0	1	0	0	0	0
108	5.27	2017-12-22	6	2	-2.32	10	1 (HBV)	1	53	18300	12700	2800	11.6	37.8	72	129	152	16.6	0.7	7.5	3.7	4.1	140	9.1	1.03	0.48	26	29	113	47	288	64	1.33	15.3	31.3	245	3.16	1		1	1	0	0	1	0
109	2.9	2023-10-08	6	1	-2.98	9	1 (HCV)	1	73	2920	2060	640	11.8	36.8	76	75	87	23.5	1.2	6.6	4.4	4.3	142	9	0.83	0.36	25	35	82	24	261	117	1.09	13.5	28	296	3.75	0		0	0	0	0	0	0
110	3.06	2021-07-01	6	1	-3.78	9	1 (HBV)	1	64	6000	3400	1800	14.5	43.7	95	171	100	19	1.2	7.2	5	5.6	141	9.8	0.3	0.15	15	27	64	33	196	160	1.03	11.8	26.4	300	2.5	0		0	0	0	0	0	0
111	5.81	2019-09-17	6	2	-2.11	9	3 (kriptojenik)	1	70	2670	1460	820	9.9	29	88	100	96	24.4	0.7	6.7	3.3	4	141	8.7	0.67	0.23	12	23	86	44	199		1.24	14	32.1	402	2.53	1		1	0	0	0	1	1
112	4.48	2021-01-20	4	2	-1.68	11	1(HBV)	3	75	3500	2600	400	11.3	33.9	93	83	89	18.6	0.6	6.7	2.9	3.9	141	8.4	0.92	0.47	16	32	143	28	210	50	1.57	17.2	29.6	229	6.58	1		0	0	0	0	0	0
113	4.88	2018-04-01	6	2	-2.11	12	3 (kriptojenik)	1	36	5800	3000	2000	17	49.9	97.6	103	74	-	0.6	-	3.65	4.2	140	8.6	1.85	0.73	28	40	105	25	279	-	1.28	15.33	32.55	-	2.55	1		0	0	1	0	0	0
114	6	2017-01-29	5	2	-2.27	14	3 (kriptojenik)	1	58	1420	1140	1100	13.1	37.4	94.7	93	286	9.35	0.7	6.9	3.46	4.5	139	9.4	1.31	0.6	69	66	131	106	268	153	1.76	19.6	38.2	226.5	2.71	1		1	1	1	0	1	0
115	1.75	2019-10-12	6	1	-3.35	7	1 (HBV)	1	68	7770	5320	1700	12.94	39.33	85.12	341.9	135	15.6	0.9	7.7	4.63	4.85	140	9.46	0.45	0.18	17	16.4	124	53	224	yok	1.06	14	22.6	yok	1.95	1		0	1	0	0	1	1
116	6.14	2023-07-13	3	2	-1.85	17	1 (HBV)	1	58	5460	3040	1460	11.5	32.6	98.8	65	116	23.2	0.84	6.5	3.34	4.75	134	8.61	1.83	1.02	40.7	60.4	105	43	298	63	1.55	18.5	31.4	197.8	5.01	1		1	1	1	0	1	1
117	4.76	2019-08-30	4	2	-2.17	17	1 (HBV + HDV)	3	36	2860	1720	760	10.44	31.77	88.44	129.1	73	9.11	0.6	7.25	3.66	4.65	133	8.6	1.58	0.63	23	60	102	36	174	yok	1.56	20.1	41.3	247	3.7	1		0	1	1	0	0	0
118	4.38	2022-06-01	6	3	-0.87	17	2 (MAFLD)	1	75	2500	1500	500	7.5	22.8	102	70	83.4	14	0.87	5.5	2.48	3.12	140	8.31	4.37	1.63	18.1	40	46	9	220	82	1.55	18.1	35	43.1	2.06	1		1	1	1	0	1	1
119	2.86	2022-03-04	5	2	-2.21	10	1(HBV)	1	47	2200	1300	500	12.9	39.2	85.9	50	106	12.9	0.86	6.8	3.68	4.81	139	8.93	1.43	0.66	36.4	63.7	126	109	258	108.3	1.26	14.9	29.2	140.6	2.42	1		0	1	0	0	0	1
120	3.53	2020-11-02	2	2	-2.41	23	3 (kriptojenik)	3	72	2200	1600	200	9.1	26.4	90.9	27	145	68.36	1.4	1.2	4.01	4.7	135	9.7	1.91	1.06	14	21	108	52	193	144.4	2.37	29.8	36.4	209	3.32	1		1	1	1	1	1	0
121	4.13	2017-05-23	6	2	-2.32	11	2 (MAFLD)	2	77	3700	2600	700	11.7	35	87.7	84	78	12.15	0.7	6.5	3.87	4.1	145	9.4	1.73	0.75	16	32	150	23	237	95	1.27	15.09	31.45	-	112.3	1		0	0	1	0	1	0
122	3.1	2024-07-27	3	3	-0.97	13	2 (MAFLD)	1	73	5380	3150	1580	11	32.6	93.9	130	189.5	13	0.8	6.26	2.51	3.93	136	8.96	3.33	1.95	25.9	69.8	140	51	393	77.5	1.12	13.6	31	218.3	4.95	1		0	0	1	0	1	0
123	3.82	2023-06-19	5	2	-2.21	11	3(kriptojenik)	1	48	700	300	300	8.1	24.2	86.9	41	109	10.5	0.83	6.5	3.52	4.48	140	8.45	0.89	0.4	12.5	23.9	50	21	132	yok	1.45	17	29.4	96.4	2	1		0	1	0	0	0	0
124	3.24	2019-09-15	6	2	-2.59	10	3 (sarkoidoz)	1	59	4000	2500	900	12	38.2	85.7	130	183	22.3	1.33	-	3.73	4.98	138	9.4	0.44	0.21	11.9	20	159	288	197	145	1.09	14.3	30.9	-	5.56	1		1?	0	0	0	1	1
125	6.61	2018-11-22	4	2	-2.05	15	3 (kriptojenik)	1	37	1700	1100	400	12.5	36	85.2	32	199	11.68	0.6	6.9	3.5	3.6	135	8.7	1.46	0.66	48	64	83	38	234	68.1	1.62	18.14	34.97	132.24	1.88	1		0	1	0	0	1	0
126	4.18	2023-06-24	3	3	-1	18	3 (Kriptojenik)	3	73	4600	3060	600	8.2	22.9	87.7	58	96.8	43.2	1.32	5.67	2.21	2.99	133	7.85	1.26	0.8	14.5	38.8	127	30	186	97.5	1.58	19.4	34.6	213.1	1.19	1		1	1	0	0	0	1
127	5.95	2019-08-16	6	1	-3.07	9	1 (HBV)	1	52	5600	3500	1300	15.9	45.9	94.7	120	106	14.3	0.8	6.9	4.67	4	142	9.1	1.35	0.43	20	22	72	18	198	87	1.09	13.03	28.23	398.76	0.854	0		0	0	0	0	0	0
128	5.32	2019-10-15	6	1	-2.94	8	3 (Kriptojenik)	1	28	5400	3600	1200	13.9	40.9	95.5	98	-	-	0.5	-	4.42	4.1	143	-	1.02	0.56	94	41	128	109	124	-	1.15	13.46	24.39	-	-	1		0	1	1	0	0	0
129	5.5	2023-05-30	4	1	-2.63	9	2 (etiyoloji?)	3	81	4510	2990	920	9.1	29.4	86	163	111.4	16.1	1.15	6.33	3.95	4.5	137	9.09	0.74	0.33	12.3	18.3	68	31	221	100	1.13	14	26.8	281.8	1.25	1		0	0	0	0	1	1
130	2.87	2016-08-06	6	1	-3.71	7	1 (HBV)	1	50	7400	4000	1900	14.6	43.3	86	176	81	24.77	0.9	7.5	4.92	3.6	144	9.9	0.3	0.16	21	17	50	28	182	153	1.09	12.78	24	385.5	1.79	0		0	0	0	0	0	0
131	6.73	2019-01-21	3	3	-1.25	18	1 (HBV + HDV)	3	43	5200	3500	1200	9.6	30	73.9	82	117	18.22	1.1	7.23	2.54	5	131	8.1	1.41	0.8	49	70	84	37	184	92.9	1.45	16.61	40.07	142.11	23.78	1		0	1	1	1	0	0
132	3.64	2018-08-06	6	1	-3.25	7	1 (HBV)	1	59	7300	4500	2200	8.4	27.8	64.3	150	228	13.55	0.9	8.4	4.61	4.4	138	9.3	0.61	0.24	12	18	69	14	160	yok	1.01	12.34	23.69	yok	3.01	0		0	0	0	0	1	0
133	2.89	2023-06-04	4	2	1.75	9	1 (HBV)	1	69	1450	890	350	7.1	23	84.2	79	94.7	15.8	0.7	5.65	2.98	4.6	136	7.58	0.91	0.55	12	24.4	193	17	153	59.9	1.21	15	27.3	170.1	1.23	1		0	1	1	0	0	0
134	4.97	2018-07-12	4	2	-2.14	11	3 (Kriptojenik)	3	62	2900	2200	200	10.4	31.2	89.3	32	116	20	1.2	7.6	3.4	5.1	135	8.4	0.79	0.39	20	62	95	8	187	-	1.31	15.78	29.74	-	3.24	1		1	1	0	1	0	0
135	5.24	2018-05-14	6	2	-2.24	11	3 (Otoimmün )	1	47	3700	2600	600	11.1	33.3	87.2	65	82	10.75	0.5	8.5	3.55	4.4	137	8.2	0.87	0.36	96	101	50	42	199	106	1.46	17.5	37.9	207.55	2.71	1		0	1	0	0	0	0
136	4.62	2016-11-20	6	1	-2.87	10	1 (HBV)	1	71	2400	1700	500	11.7	34.6	89.7	56.1	97	14.49	0.5	6.3	4.25	3.8	144	8.5	0.79	0.35	23	31	87	15	265	yok	1.36	16.43	31.51	204.67	2.04	1		0?	1	0	0	0	0
137	4.23	2021-10-22	2	2	-2	11	3 (Kriptojenik)	3	66	5200	4100	400	11.5	33.7	96.7	99	97.1	39.35	0.84	6.9	3.56	3.81	137	9.74	2.12	1.1	8.6	32.7	87	15	1358	120.2	1.18	15.7	25.6	188.5	1.13	1		0	1	1	0	1	0
138	9.82	2015-10-16	5	2	-1.46	23	1 (HBV)	3	64	3700	2600	500	9.9	28.5	110	7	196	14.95	0.9	7	3.3	4.23	129	8.55	6.4	2.24	29	75	135	50	782	76	1.4	16	32.73		3.55	1		0	0	1	0	0	1
139	3.3	2022-08-07	6	1	-2.81	8	2 (MAFLD)	1	82	1900	1000	600	8.9	27.7	82.4	83	96.9	20.4	0.9	6.26	4.07	4.65	144	8.59	0.57	0.3	19.5	33.9	51	31	163	98.2	1.13	13.4	24.6	280.8	1.07	1		1	1	1	0	1	1
140	3.38	2021-07-07	2	2	-1.82	24	1 (HBV)	3	58	21300	18400	300	8	23.4	78	80	247.1	58.4	2.2	7.23	3.16	3.38	132	8.25	1.24	0.85	17.6	24.7	101	41	165	76	1.69	19.6	35.8	400.6	1.17	1		1	1	0	1	1	0
141	3.18	2019-01-24	5	2	-2.46	10	1 (HBV)	1	62	4000	1900	1500	13.6	40	88.3	64	318	13.08	0.8	7.4	3.88	4	139	9	1.07	0.59	20	41	71	112	210	78	1.3	15.33	27.71	yok	5.83	1		1	1	1	0	1	0
142	3.48	2023-08-18	4	3	-3.13	18	1 (HBV)	3	65	6070	5100	320	8.5	25.6	95.9	65	130	17.5	1.19	5.6	2.52	3.54	130	7.72	1.1	0.6	5.2	36.9	178	115	124	51.3	1.36	16.8	36.2	311.6	3.9	1		0	1	0	0	0	0
143	3.55	2017-09-24	6	2	-2.26	8	2 (MAFLD)	1	45	5600	2300	2600	14	41.7	94.8	91	137	5.61	0.6	7.5	3.61	3.7	141	9	0.99	0.49	97	108	234	145	223	yok	1.19	14.1	35.15	247.64	14.18	1		1	0	1	0	0	0
144	3.9	2020-07-30	6	1	-2.78	7	1 (HBV)	1	50	4300	2300	1100	11.9	34.9	86.4	102	449	24.1	0.87	6.7	3.96	5.04	134	9.04	0.45	0.24	79.7	58.3	146	198	230	115.8	1.08	14.6	30.8	288.1	3.06	0		0	0	0	0	1	1
145	3.48	2022-07-25	6	1	-3.25	9	1 (HBV)	1	39	2800	1700	800	14.1	41.9	82.5	74	115	8.1	0.71	7.8	4.88	4.23	141	9.47	1.35	0.44	11.8	21.3	72	20	139	66	1.12	12.76	28.2	339.5	2.06	0		0	0	0	0	0	0
146	4.4	2022-12-21	1	2	-1.82	14	3 (PSK)	3	61	7300	4400	1300	11.4	33.7	87.4	132	130	12.2	0.71	0.5	3.26	4.3	139	8.82	1.61	1.08	33.5	45.7	136	45	267	114	1.62	19	32.5	197.8	3.27	1		1	0	1	1	0	0
147	3	2020-10-21	6	1	-2.84	7	3 (Kriptojenik)	3	77	7200	5900	700	10.5	33.8	67.2	498	109	9.4	0.68	7.7	4.13	5.18	136	9.69	0.61	0.27	15.5	35.4	418	199	238	130.2	1.02	13.5	32	575	2.44	1		0	0	0	1	0	0
148	4.88	2020-10-10	5	2	-1.87	9	1(HBV)	1	66	5100	3500	1000	10.1	29	99.2	58	104	11.1	0.65	7.3	3.12	4.75	141	8.65	0.88	0.59	59.4	72	136	190	254	60	1.25	16.3	28.8	yok	1.97	0		0	0	0	0	1	1
149	2.67	2022-11-25	6	1	-3.4	6	1(HBV)	1	65	10100	7300	1700	13.7	40.9	80.3	163	235	17	0.87	7.3	4.83	4.55	138	9.31	0.68	0.28	26.1	25.6	103	35	193	73	0.97	11.7	23.3	328.9	2.12	0		0	0	0	0	1	1
150	3.66	2022-09-19	4	2	-2.02	10	1(HCV)	1	68	4500	2100	1800	13.5	41	87.4	86	112	13.08	0.59	yok	3.4	4.25	142	9.13	1.23	0.64	34.4	46.7	105	12	252	114	1.29	16.5	33.7	yok	2.31	1		1	0	0	0	0	0
151	3.9	2022-06-27	2	2	-2.12	9	2(MAFLD)	3	55	10200	7100	1600	13	39.6	88.2	364	48.1	49.1	1.21	7.65	3.35	4.72	139	8.64	0.73	0.5	19	30.4	336	152	175	160.7	1.09	13	27.2	529.4	1.59	1		1	1	1	0	1	1
152	5.54	2015-06-09	6	2	-2.36	12	1 (HBV+HDV)	1	53	4700	3000	1100	12	35.8	93.8	49	85	16.8	0.99	7.3	3.95	4.82	141		1.9	0.94	44	56	161	34	193	170	1.35	15.59	30.61		3.78	1		1	0	1	0	0	0
153	2.96	2020-11-15	4	2	-2.53	12	1(HBV)	3	59	4200	2200	1600	11.1	34.6	87.4	186	140	34.39	1.7	7.22	3.62	4.23	142	9	0.39	0.2	35	44	159	125	143	134.9	1.04	13.7	30.5	283.8	3.49	1		1	0	0	1	1	1
154	3.77	2023-01-08	6	1	-2.96	6	1(HBV)	1	66	4430	1430	2390	14	41.1	95.1	164	169	25.7	0.88	7.4	4.44	4.49	138	9.54	0.99	0.5	18.7	27.6	103	33	182	84	0.96	11.6	27.3	151.7	3.21	1		0	0	1	0	1	1
155	4.66	2020-02-02	6	2	-2.15	12	3(PBK)	1	60	6800	3300	2400	2025-09-13	40.3	97	86	80		0.58	7.5	3.68	3.91	146	9.33	1.77	0.85	21	52	128	37	260		1.41	15.6	31.5		5.18	1		0	0	0	0	0	1
156	3.89	2023-01-23	5	2	-2.09	9	2(MAFLD)	1	63	5450	2850	1890	12	35.3	82.5	114	146	10.4	0.69	7	3.32	3.96	144	9.13	0.75	0.43	35	57	93	40	159		1.28	15.3	28.2		2.43	1		1	1	1	0	1	1
157	7.01	2019-09-02	6	2	-2.29	9	1(HBV)	1	51	5800	3500	1500	13.1	39.1	87.8	80	347	11.3	0.76	6.6	3.72	4.49	139	9.54	1.24	0.57	58.2	67.5	257	177	281	178	1.16	13.41	28.2	209.36	2.41	1		1	1	0	0	1	0
158	7.71	2019-01-13	4	3	-1.12	19	1(HBV)	3	70	6400	4300	800	11.5	34.7	94	60	83		1.2	6.9	2.62	4.5	140	9.4	2.81	1.44	18	37	73	22	264		1.93	18.44	32.73		8.32	1		0	0	1	0	1	0
159	3.74	2016-01-25	6	2	-2.22	13	3 (Kriptojenik)	1	67	3500	2200	700	9.2	27.9	89.9	43	173	11.68	0.8	8.3	3.87	4.3	139	8.7	2.41	0.96	22	26	151	59	194	48	1.35	15.91	31.91	142.87	1.85	1		0	1	1	0	1	0
160	3	2021-04-14	6	2	-2.3	10	2 (ALD)	1	63	6400	2900	2100	13.3	39.4	94.2	168	212	13	0.68	7.4	3.86	4.36	138	9.61	1.8	0.73	26.7	27.8	141	200	213	84.2	1.11	14.9	28.9	314.6	yok	1		1	0	1	0	1	1
161	3.6	2018-12-01	4	2	-2.47	12	1(HBV)	1	52	4900	2900	1400	13.5	40.8	85.6	140	116	9.81	0.7	8.15	4.04	4.4	137	8.8	1.69	0.56	98	80	136	160	247	140.38	1.44	14.66	28.6	231.7	6.41	1		0	0	0	0	0	0
162	4.33	2019-02-18	5	2	-2.58	10	1(HCV)	1	77	4000	1800	1800	12.4	37.6	92.1	81	99	24.8	1.15	7.4	4.03	4.64	139	9.1	1.11	0.56	40.8	57.7	158	45	188	78.4	1.15	13.82	28.36	98.9	17.59	1		0	1	1	1	0	1
163	3.05	2022-11-11	4	2	-1.52	8	1 (HBV)	3	66	3800	2700	400	11.7	35.9	92.9	126	105.3	18	1.06	yok	2.79	4.26	139	7.93	1.15	0.48	11.9	21.4	84	36	227	75	1.08	12.9	26.8	274.7	4.05	1		0	0	0	0	0	0
164	5.06	2022-08-27	3	2	-1.47	20	3 (PBK)	2	71	5100	4400	400	7.8	24	102	46	169	59	1.34	5.32	3.26	3.48	138	9.22	5.44	3.66	17	21	215	19	159		1.44	16.9	26.1	114	114	1		1	0	1	1	0	0
165	2.19	2020-09-27	6	1	-3.02	6	3 (otoimmün +pbk)	1	46	7400	5000	1700	10.8	32.9	80	308	123	15.8	0.56	7.4	4.26	4.36	142	9.55	0.47	0.38	95	55	387	492	195	151	0.8	11	34.4		3.94	0		0	0	0	0	1	0
